# Supplementary material for: Process Evaluation of a Nutrition and Lifestyle Behavior Peer Support Program for Adults with Metabolic Syndrome
Source: PubMed Central journal article supplement (PMC7215631; doi:10.3390/ijerph17082641), 2020-04-12
Supplement: ijerph-17-02641-s001.pdf [file ijerph-17-02641-s001.pdf]

# SINDROM METABOLIK

tekanan darah tinggi

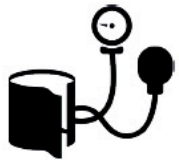

gula dalam darah tinggi

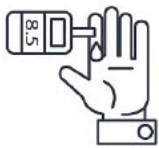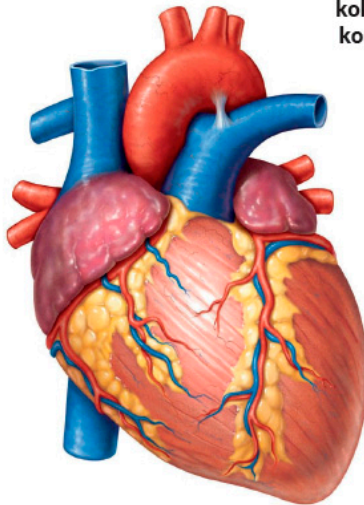

kolesterol baik (HDL) rendah  
kolesterol jahat (LDL) tinggi

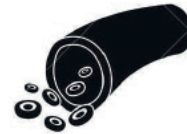

buncit dan kegemukan

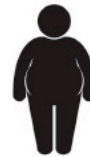

# KEMATIAN AWAL

# PELAN DIET SEHARIAN

50 KCAL

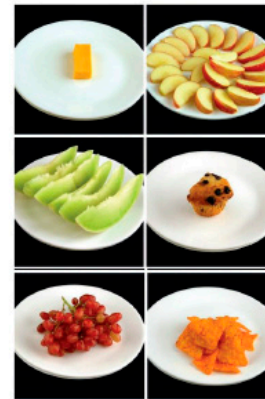

600 KCAL

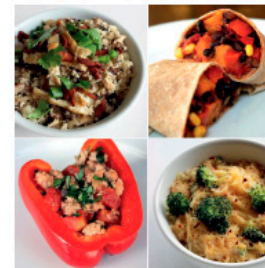

|          |                                 |
|----------|---------------------------------|
| 50 KCAL  | 6.30 PAGI - 7.00 PAGI           |
| 600 KCAL | 7.00 PAGI - 8.30 PAGI           |
| 50 KCAL  | 10.00 PAGI - 10.30 PAGI         |
| 600 KCAL | 12.00 TENGAH HARI - 2.00 PETANG |
| 50 KCAL  | 4.30 PETANG - 5.30 PETANG       |
| 600 KCAL | 6.30 PETANG - 8.30 MALAM        |
| 50 KCAL  | 8.30 MALAM - 9.00 MALAM         |
|          |                                 |

Figure S1. Sample pages of booklet given to peer supporters

# PIRAMID MAKANAN SIHAT

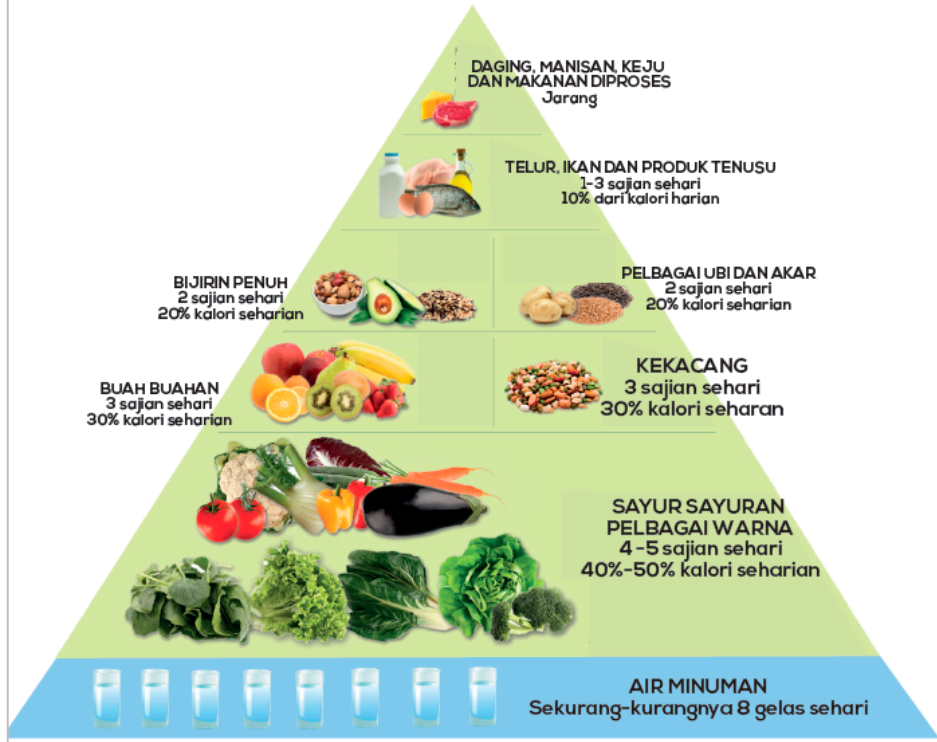

# REKOD MAKANAN ANDA SETIAP HARI

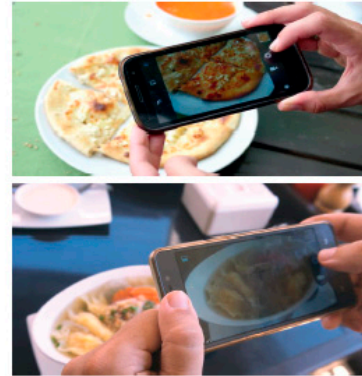

|                  | MONDAY | TUESDAY | WEDNESDAY | THURSDAY | FRIDAY | SATURDAY | SUNDAY |
|------------------|--------|---------|-----------|----------|--------|----------|--------|
| Breakfast        |        |         |           |          |        |          |        |
| Snack            |        |         |           |          |        |          |        |
| Snack            |        |         |           |          |        |          |        |
| Snack            |        |         |           |          |        |          |        |
| Dinner           |        |         |           |          |        |          |        |
| Snack            |        |         |           |          |        |          |        |
| H <sub>2</sub> O |        |         |           |          |        |          |        |

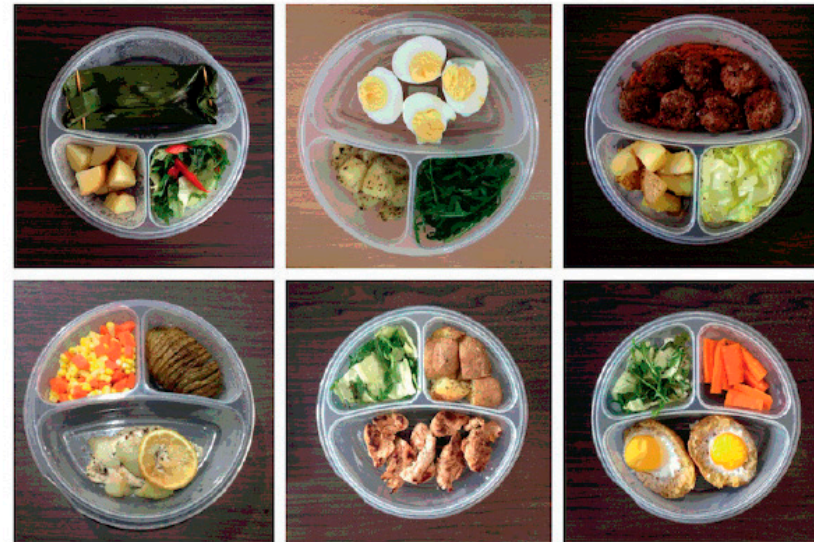

Figure S1. Sample pages of booklet given to peer supporters (continued)
